# Supplementary material
Source: PubMed Central journal article supplement (PMC3622452)
Supplement: NIHMS441270-supplement-01.pdf [file NIHMS441270-supplement-01.pdf]

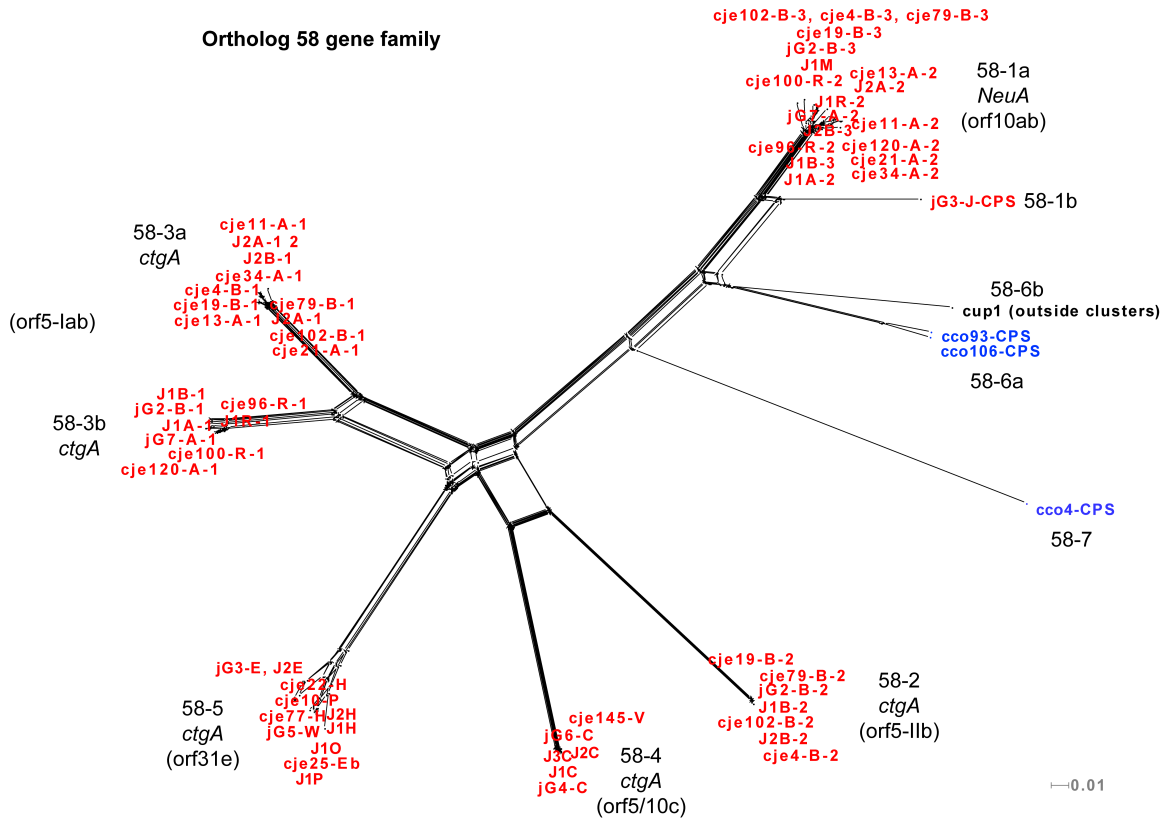

**Fig. S1.** Split network based on nucleotide sequences showing relationship among different CDS representing ortholog 58. *C. jejuni* subsp. *jejuni* strains are shown in red and *C. coli* strains are shown in blue. Class IDs are shown in upper case after strain IDs (see Table 1 for additional strain information). Number following class IDs A, B, and C indicates the order in which the particular ortholog copy occurred in the class. For reference, gene IDs used by Godschalk et al. (2004) are shown in parentheses.

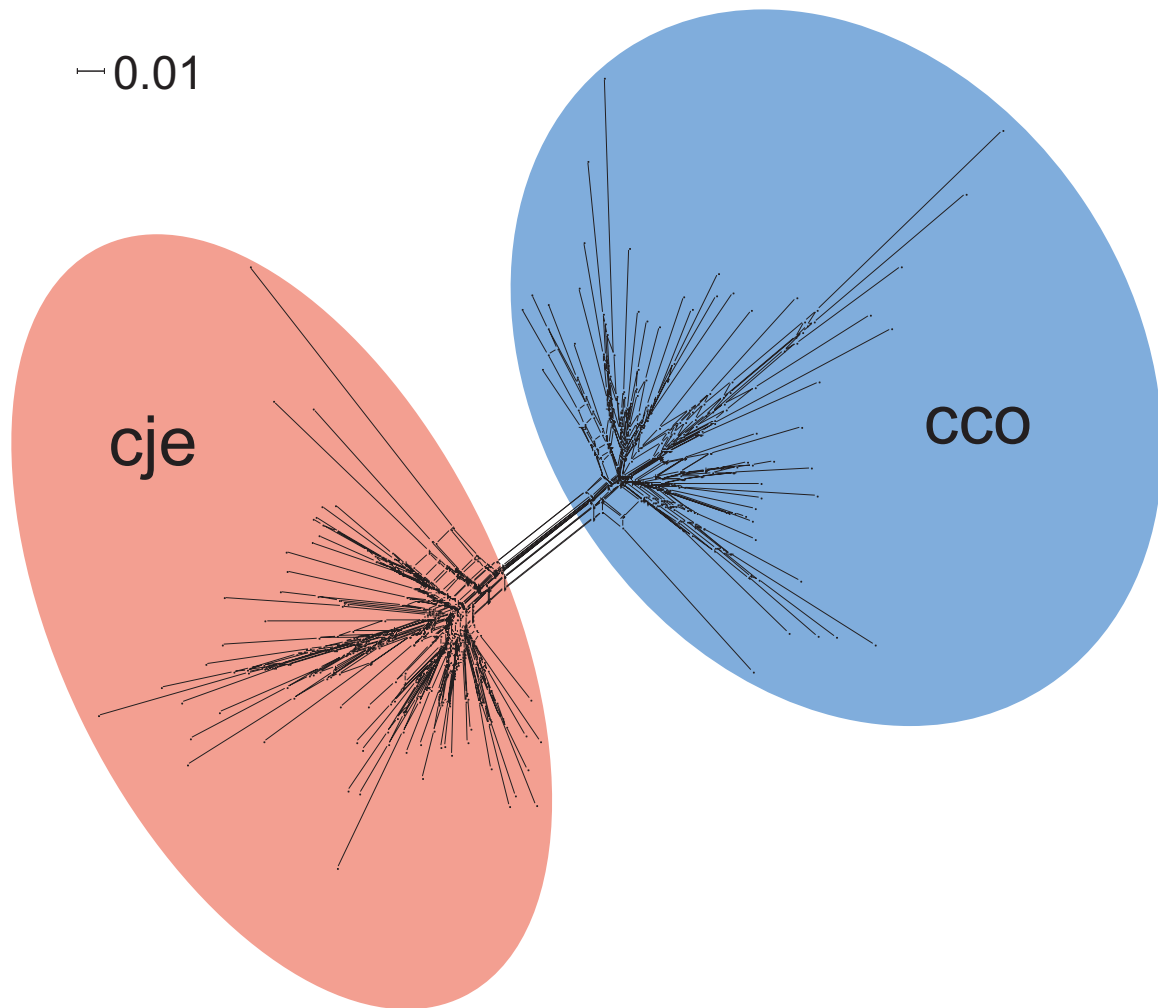

**Fig. S2.** Split network utilizing genomic data (gene content) for *C. coli* (cco, blue) and *C. jejuni* subsp. *jejuni* (cje, red). Network was based on the collective dispensable genome (i.e. presence/absence of 2901 orthologs not shared among all strains analyzed).

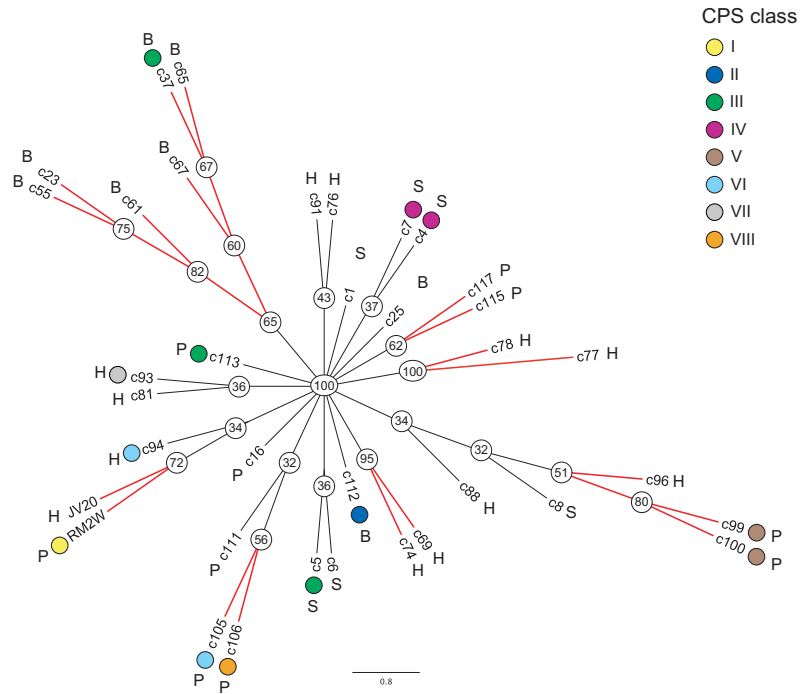

**Fig. S3.** Phylogeny showing the consensus of 399 gene-trees for *C. coli*. Numbers in circles show the proportion of gene-trees that supported a particular grouping. Branches for groupings with greater than 50% support are shown in red. Colored circles identify the different CPS classes. Strain isolation source is shown with a single letter code (H=human, B=bovine, S=swine, and P=poultry).

**Table S3-A (A-G).** Number of homopolymeric tracts for each gene cluster

|           |          | <i>C. jejuni</i> subsp. <i>jejuni</i> |          |          |          |          |          |          |  |
|-----------|----------|---------------------------------------|----------|----------|----------|----------|----------|----------|--|
|           |          | LOS n=22                              |          |          |          | CPS n=12 |          |          |  |
| <b>bp</b> | <b>A</b> | <b>C</b>                              | <b>G</b> | <b>T</b> | <b>A</b> | <b>C</b> | <b>G</b> | <b>T</b> |  |
| 5         | 2044     | 3                                     | 20       | 1235     | 1973     | 5        | 70       | 1367     |  |
| 6         | 1155     |                                       | 3        | 461      | 938      |          | 11       | 492      |  |
| 7         | 442      |                                       | 4        | 201      | 348      |          | 2        | 230      |  |
| 8         | 109      |                                       | 18       | 39       | 87       |          | 0        | 38       |  |
| 9         | 2        |                                       | 3        | 18       | 24       |          | 29       | 10       |  |
| 10        |          |                                       |          |          |          |          | 6        |          |  |

**Table S3-B**

|           |          | <i>C. coli</i> |          |          |          |          |          |          |  |
|-----------|----------|----------------|----------|----------|----------|----------|----------|----------|--|
|           |          | LOS n=8        |          |          |          | CPS n=8  |          |          |  |
| <b>bp</b> | <b>A</b> | <b>C</b>       | <b>G</b> | <b>T</b> | <b>A</b> | <b>C</b> | <b>G</b> | <b>T</b> |  |
| 5         | 997      |                | 14       | 626      | 1334     | 6        | 28       | 955      |  |
| 6         | 520      |                | 4        | 208      | 614      |          | 5        | 385      |  |
| 7         | 166      |                |          | 100      | 250      |          | 2        | 183      |  |
| 8         | 57       |                |          | 5        | 102      |          | 0        | 29       |  |
| 9         | 7        |                |          |          | 12       |          | 8        | 5        |  |
| 10        |          |                |          |          |          |          |          |          |  |

**Table S3-C**

|           |          | <i>C. jejuni</i> subsp. <i>doylei</i> |          |          |          |          |          |          |  |
|-----------|----------|---------------------------------------|----------|----------|----------|----------|----------|----------|--|
|           |          | LOS n=1                               |          |          |          | CPS n=1  |          |          |  |
| <b>bp</b> | <b>A</b> | <b>C</b>                              | <b>G</b> | <b>T</b> | <b>A</b> | <b>C</b> | <b>G</b> | <b>T</b> |  |
| 5         | 60       |                                       |          | 38       | 87       |          | 7        | 69       |  |
| 6         | 34       |                                       |          | 13       | 45       |          | 2        | 21       |  |
| 7         | 11       |                                       |          | 10       | 18       |          |          | 9        |  |
| 8         | 3        |                                       |          | 2        | 3        |          |          |          |  |

**Table S3-D**

|           |          | <i>C. lari</i> |          |          |          |          |          |          |  |
|-----------|----------|----------------|----------|----------|----------|----------|----------|----------|--|
|           |          | LOS n=1        |          |          |          | CPS n=1  |          |          |  |
| <b>bp</b> | <b>A</b> | <b>C</b>       | <b>G</b> | <b>T</b> | <b>A</b> | <b>C</b> | <b>G</b> | <b>T</b> |  |
| 5         | 144      |                | 2        | 79       | 158      |          | 6        | 121      |  |
| 6         | 65       |                |          | 20       | 71       |          |          | 30       |  |
| 7         | 36       |                |          | 13       | 34       |          |          | 25       |  |
| 8         | 14       |                |          | 3        | 7        |          |          | 7        |  |
| 9         |          |                |          |          | 5        |          |          | 2        |  |

**Table S3-E**

|           | <i>C. upsaliensis</i> |          |          |          | <i>C. fetus</i> subsp. <i>fetus</i> |          |          |          |
|-----------|-----------------------|----------|----------|----------|-------------------------------------|----------|----------|----------|
|           | LOS n=1               |          |          |          | LOS n=1                             |          |          |          |
| <b>bp</b> | <b>A</b>              | <b>C</b> | <b>G</b> | <b>T</b> | <b>A</b>                            | <b>C</b> | <b>G</b> | <b>T</b> |
| 5         | 161                   | 5        | 7        | 104      | 72                                  |          |          | 40       |
| 6         | 56                    |          | 2        | 46       | 37                                  |          |          | 22       |
| 7         | 27                    |          |          | 13       | 10                                  |          |          | 4        |
| 8         | 3                     |          |          |          | 3                                   |          |          |          |

**Table S3-F**

|           | <i>C. rectus</i> |          |          |          | <i>C. showae</i> |          |          |          |
|-----------|------------------|----------|----------|----------|------------------|----------|----------|----------|
|           | LOS n=1          |          |          |          | LOS n=1          |          |          |          |
| <b>bp</b> | <b>A</b>         | <b>C</b> | <b>G</b> | <b>T</b> | <b>A</b>         | <b>C</b> | <b>G</b> | <b>T</b> |
| 5         | 68               |          | 3        | 53       | 76               |          | 2        | 61       |
| 6         | 24               |          |          | 14       | 21               |          |          | 11       |
| 7         | 8                |          |          | 3        | 10               |          |          | 3        |
| 8         |                  |          |          |          |                  |          |          |          |

**Table S3-G**

|           | <i>C. curvus</i> |          |          |          | <i>C. concisus</i> |          |          |          |
|-----------|------------------|----------|----------|----------|--------------------|----------|----------|----------|
|           | LOS n=1          |          |          |          | LOS n=1            |          |          |          |
| <b>bp</b> | <b>A</b>         | <b>C</b> | <b>G</b> | <b>T</b> | <b>A</b>           | <b>C</b> | <b>G</b> | <b>T</b> |
| 5         | 45               |          | 2        | 34       | 59                 |          |          | 23       |
| 6         | 20               |          |          | 16       | 24                 |          |          | 11       |
| 7         | 8                |          |          | 2        | 3                  |          |          |          |
| 8         |                  |          |          | 2        | 2                  |          |          |          |

Where applicable, single representative strains for each class were analyzed (n = number of classes).
